# Supplementary material for: Enhanced charge separation in g-C3N4–BiOI heterostructures for visible light driven photoelectrochemical water splitting
Source: Royal Society of Chemistry journal article supplement (doi:10.1039/c8na00264a), 2019-01-01
Supplement: c8na00264a1.pdf [file c8na00264a1.pdf]

## SUPPLEMENTARY INFORMATION

### Enhanced Charge Separation in g-C<sub>3</sub>N<sub>4</sub> – BiOI Heterostructures for Visible Light Driven Photoelectrochemical Water Splitting

Kazi Alam,<sup>1†</sup> Pawan Kumar,<sup>1†</sup> Piyush Kar,<sup>1</sup> Ujwal Thakur,<sup>1</sup> Sheng Zeng,<sup>1</sup> Kai Cui<sup>2</sup> and Karthik Shankar<sup>1</sup>

<sup>1</sup>Department of Electrical & Computer Engineering, University of Alberta, Edmonton, AB T6G 1H9 Canada

<sup>2</sup>Nanotechnology Research Centre, National Research Council of Canada, Edmonton, Canada T6G 2M9

\*corresponding author's email address: kshankar@ualberta.ca

†These authors contributed equally

#### Applied bias photon-to-current efficiency (ABPE):

The ABPE% was calculated by using following formula:

$$\text{ABPE (\%)} = [J (\text{mA cm}^{-2}) \times (1.23 - V_b) / P (\text{mW cm}^{-2})] \times 100 \dots\dots\dots \text{Eqn- (1)}$$

Where,  $J$  is the current density,  $V_b$  is applied voltage at RHE scale and  $P$  is power density of the incident light.

The applied voltage on Ag/AgCl scale was converted RHE scale by using following expression.

$$V_{\text{RHE}} = V_{\text{Ag/AgCl}} + 0.059 \text{ pH} + V^0_{\text{Ag/AgCl}} \dots\dots\dots \text{Eqn - (2)}$$

Where;  $V^0_{\text{Ag/AgCl}} = 0.197 \text{ V}$ .

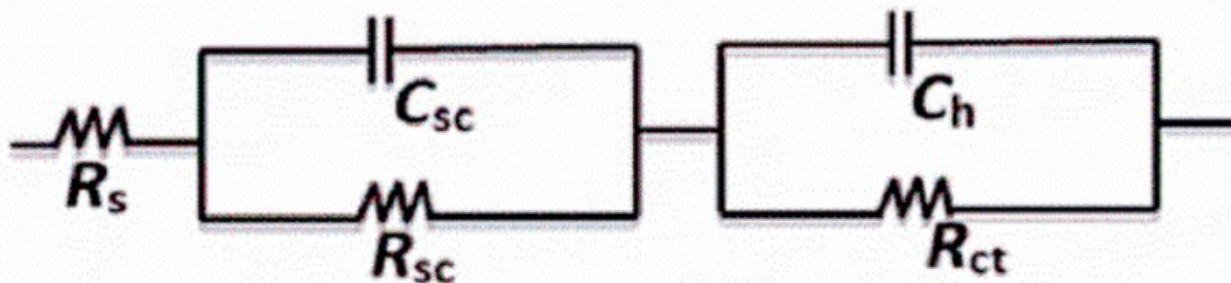

**Figure S1.** Equivalent circuit used to model the EIS Nyquist plots for g-C<sub>3</sub>N<sub>4</sub>-S, g-C<sub>3</sub>N<sub>4</sub>, BiOI, g-C<sub>3</sub>N<sub>4</sub>-S/BiOI, and g-C<sub>3</sub>N<sub>4</sub>/BiOI films. EIS data was obtained using AM1.5 G one sun illumination, in the frequency range of 0.1 to 10000 Hz, and at a potential of -0.2 V vs Ag/AgCl.

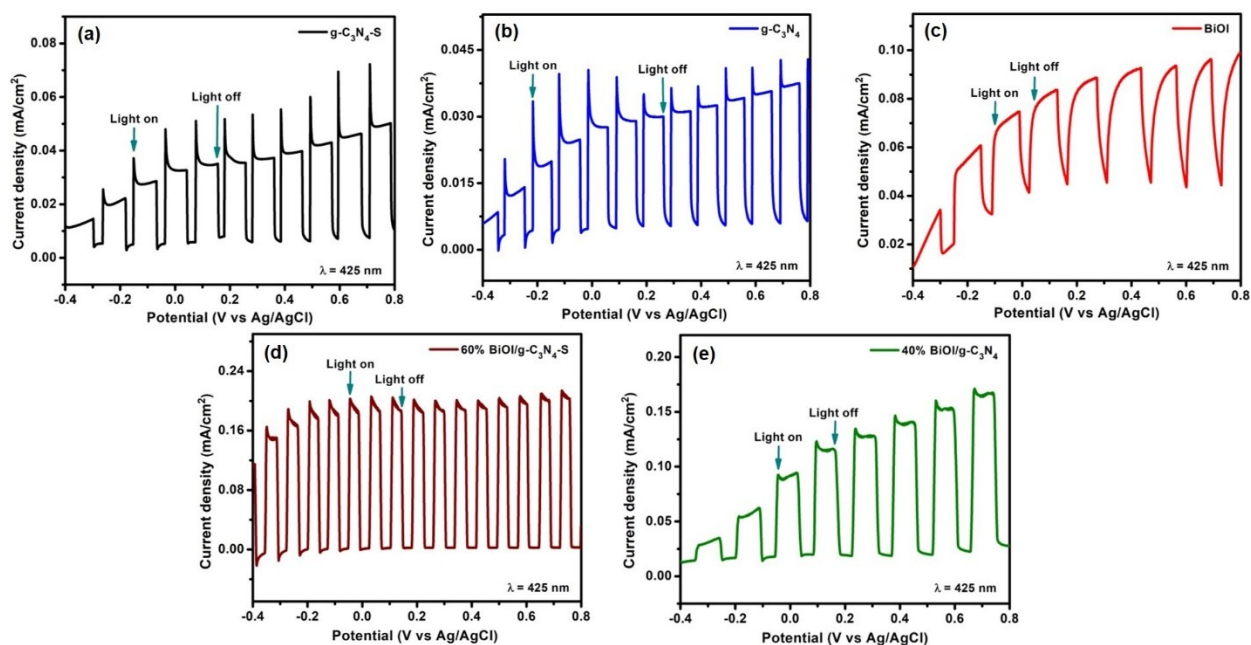

**Figure S2.** Photocurrent response under 425 nm LED light ( $54.15 \text{ W cm}^{-2}$ ) during on-off cycle for (a) g-C<sub>3</sub>N<sub>4</sub>-S (black), (b) g-C<sub>3</sub>N<sub>4</sub> (blue), (c) BiOI (red), (d) g-C<sub>3</sub>N<sub>4</sub>-S/BiOI (wine red) and (e) g-C<sub>3</sub>N<sub>4</sub>/BiOI (green)

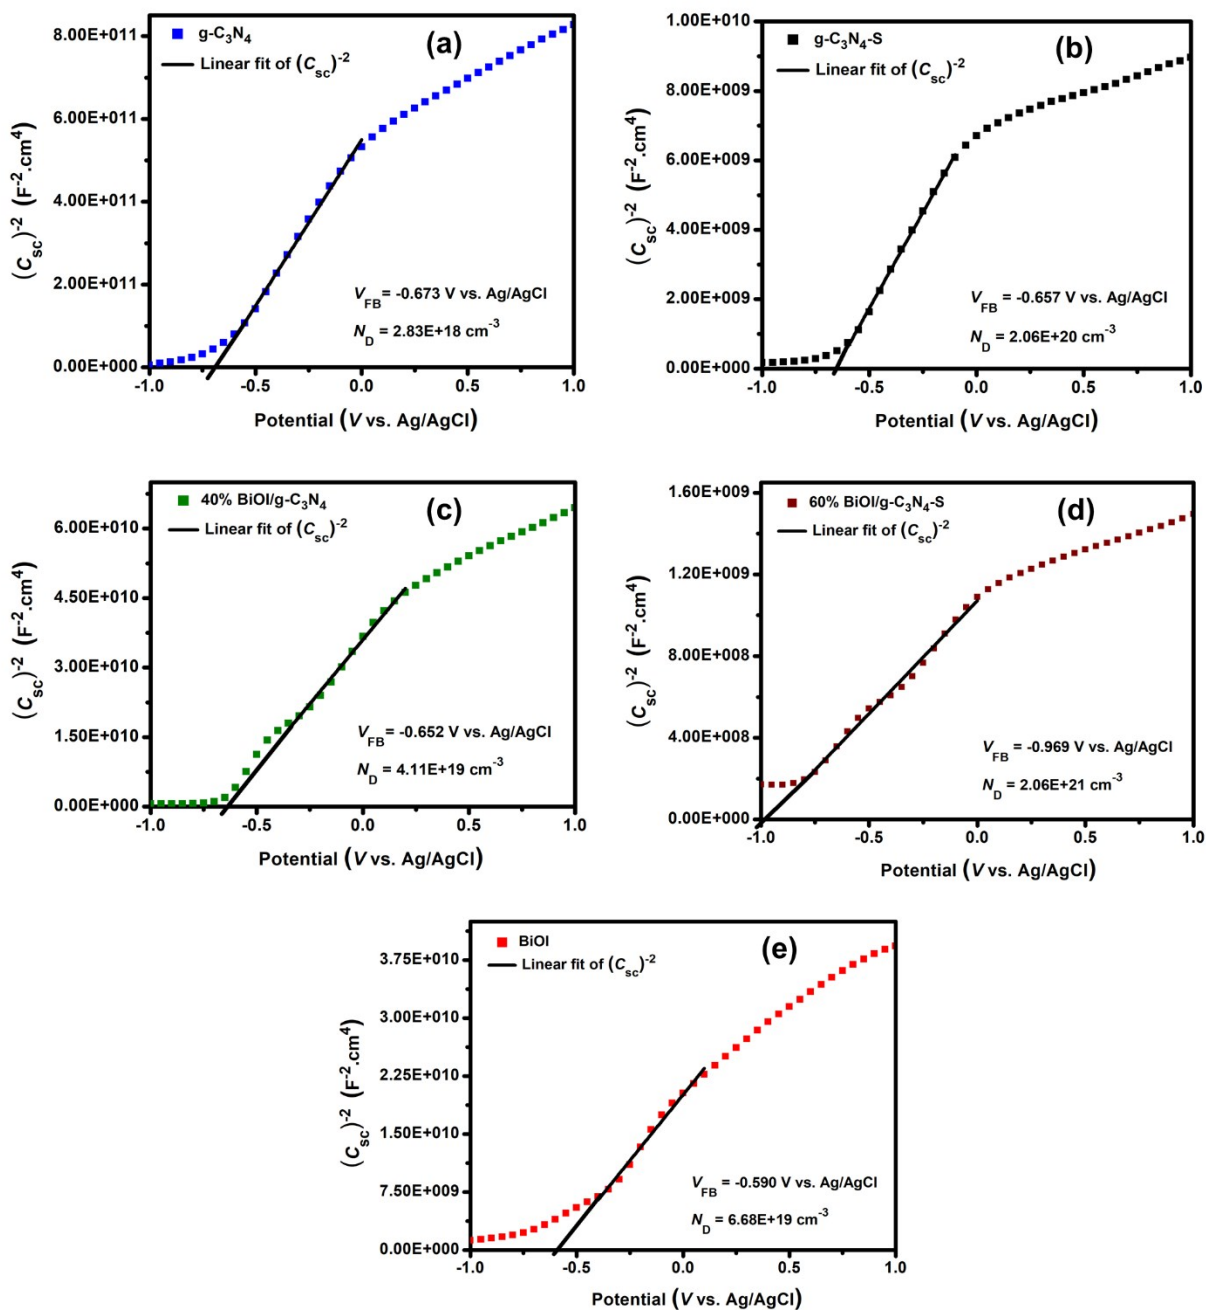

**Figure S3.** Mott-Schottky plots of bulk  $g-C_3N_4$  (blue),  $g-C_3N_4-S$  (black), 40% BiOI/ $g-C_3N_4$  (green), 60% BiOI/ $g-C_3N_4-S$  (wine red), and BiOI (red).

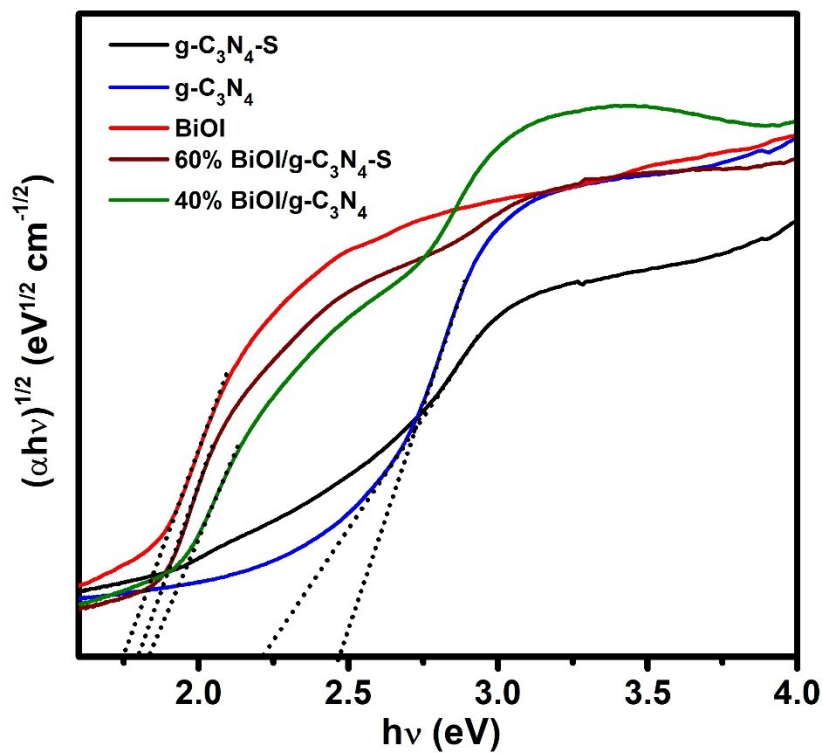

**Figure S4.** Tauc plots for the determination of the effective optical bandgaps of  $\text{g-C}_3\text{N}_4\text{-S}$  (black), bulk  $\text{g-C}_3\text{N}_4$  (blue), BiOI (red),  $\text{g-C}_3\text{N}_4\text{-S/BiOI}$  (wine) and  $\text{g-C}_3\text{N}_4\text{/BiOI}$  (olive green).

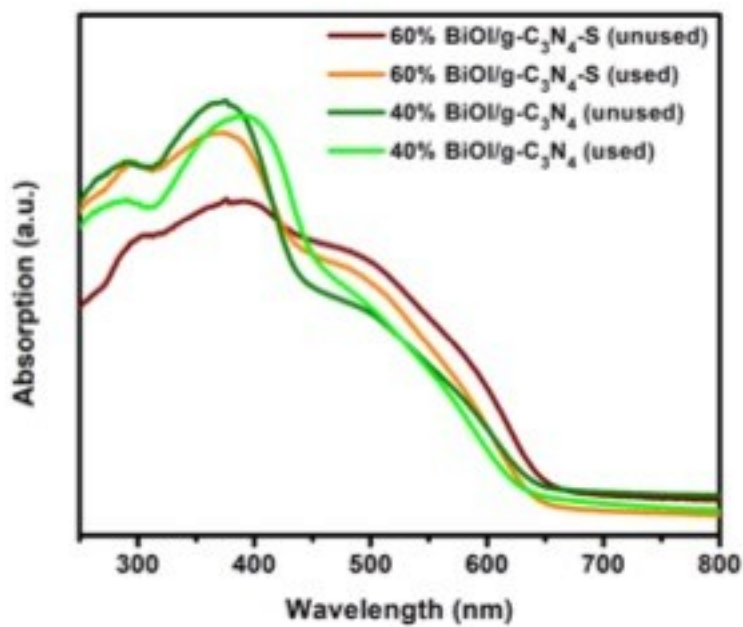

**Figure S5.** UV-Vis absorption spectra collected in diffuse reflectance mode (DR) mode for  $g\text{-C}_3\text{N}_4\text{-S}/\text{BiOI}$  and  $g\text{-C}_3\text{N}_4/\text{BiOI}$  heterostructures before (wine red and green) and after (orange and light green) several photoelectrochemical cycles respectively.

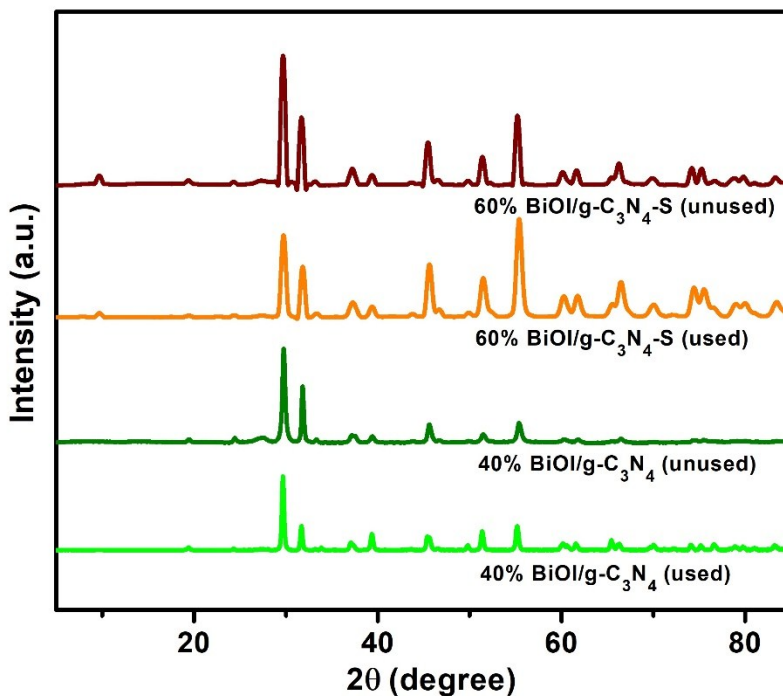

**Figure S6.** X-Ray diffractograms of  $g\text{-C}_3\text{N}_4\text{-S}/\text{BiOI}$  and  $g\text{-C}_3\text{N}_4/\text{BiOI}$  heterostructures before (wine red and green) and after (orange and light green) several photoelectrochemical cycles.

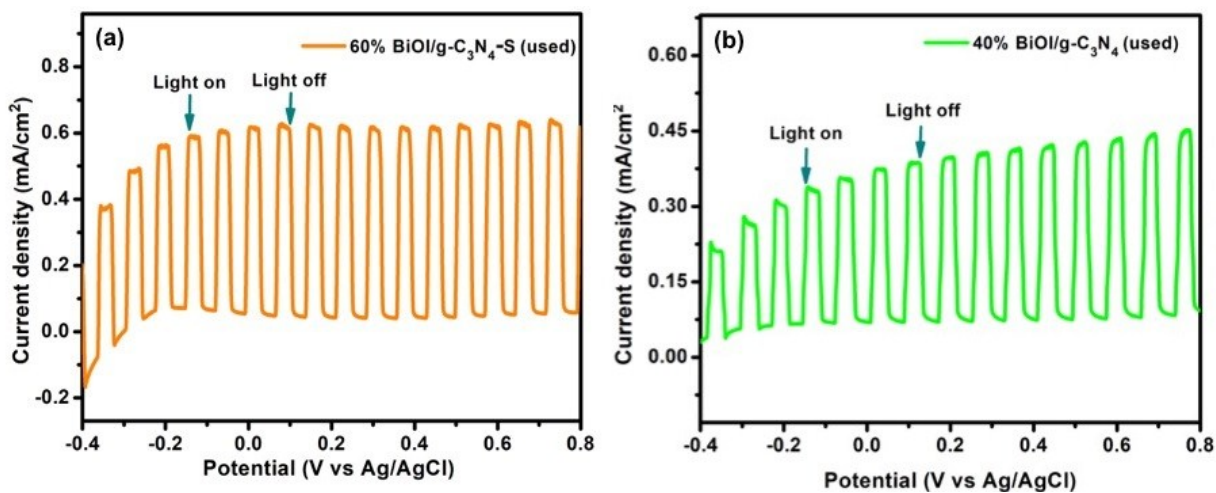

**Figure S7.** Photoelectrochemical re-use data for (a)  $g\text{-C}_3\text{N}_4\text{-S}/\text{BiOI}$  (orange) and (b)  $g\text{-C}_3\text{N}_4/\text{BiOI}$  (light green).

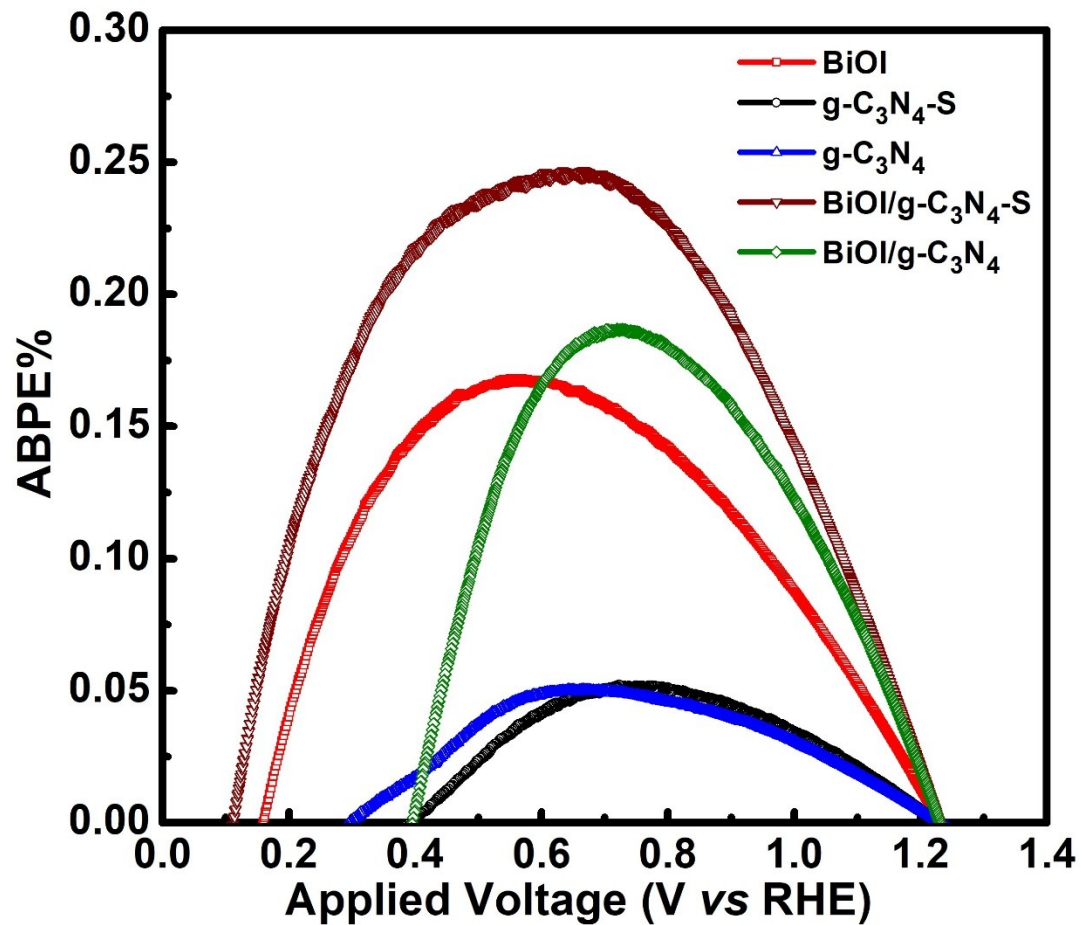

**Figure S8.** ABPE % vs RHE plot under AM1.5G light irradiation ( $100 \text{ mW cm}^{-2}$ ) for g-C<sub>3</sub>N<sub>4</sub>-S/BiOI (wine red), g-C<sub>3</sub>N<sub>4</sub>/BiOI (green), g-C<sub>3</sub>N<sub>4</sub>-S (black), g-C<sub>3</sub>N<sub>4</sub> (blue), BiOI (g-C<sub>3</sub>N<sub>4</sub>-S).
